# Supplementary material
Source: MDPI journal article supplement (https://www.mdpi.com/2297-8739/9/10/289)
Supplement: s1 [file s1]

## Supplementary Materials for the Article:

### Identification of photodegradation products of escitalopram in surface water by HPLC-MS/MS and preliminary characterization for their potential impact on the environment

Veronica Termopoli<sup>1</sup>, Viviana Consonni<sup>1</sup>, Davide Ballabio<sup>1</sup>, Roberto Todeschini<sup>1</sup>, Marco Orlandi<sup>1</sup>, and Fabio Gosetti<sup>1,\*</sup>

<sup>1</sup> Department of Earth and Environmental Sciences (DISAT), University of Milano-Bicocca, Piazza della Scienza 1, 20126 Milano, Italy

\* Correspondence: [fabio.gosetti@unimib.it](mailto:fabio.gosetti@unimib.it)

**Table S1.** Selected Reaction Monitoring transitions of the HPLC-MS/MS method for ESC and TPs monitoring.

| Precursor ion<br>[M+H] <sup>+</sup><br><i>m/z</i> | Product<br>ions<br><i>m/z</i> |
|---------------------------------------------------|-------------------------------|
| 245                                               | 200 /227                      |
| 247                                               | 229 /202                      |
| 261                                               | 216/243                       |
| 311                                               | 109/262                       |
| 323                                               | 260/109                       |
| 325                                               | 109/262                       |
| 327                                               | 309/109                       |
| 337                                               | 274/294                       |
| 339                                               | 276/258                       |
| 341                                               | 262/109                       |
| 343                                               | 237/109                       |
| 355                                               | 294/337                       |
| 357                                               | 339/321                       |

**Table S2.** *In silico* prediction of ecotoxicity, mutagenicity, bioaccumulation and persistence of ESC and its TPs by VEGA [44] and T.E.S.T. [45] software

| ID   | SMILES                                                             | ToxFish <sup>1</sup> | ToxDaph <sup>2</sup> | ToxTpyr <sup>3</sup> | ToxRat <sup>4</sup> | Ames <sup>5</sup> | ToxDev <sup>6</sup> | Biodeg <sup>7</sup> | BCFmAG <sup>8</sup> | PerWat <sup>9</sup> | PerSed <sup>10</sup> | PerSoil <sup>11</sup> |
|------|--------------------------------------------------------------------|----------------------|----------------------|----------------------|---------------------|-------------------|---------------------|---------------------|---------------------|---------------------|----------------------|-----------------------|
| ESC  | <chem>C[NH+](C)CCC[C@]2(OCc1cc(ccc12)C#N)c3ccc(F)cc3</chem>        | 0.29                 | 3.90                 | 4.70                 | 688.7               | -                 | +                   | nonRB*              | 2.44                | 23                  | 157                  | 23                    |
| TP1  | <chem>C[NH+](C)CCC(O)C2OC(=O)c1cc(ccc12)C#N</chem>                 | 1.96                 | 5.30                 | 47.48                | 418.8               | -                 | +                   | nonRB               | 0.09                | 7                   | 23                   | 34                    |
| TP2  | <chem>C[NH+](C)CCCC2OC(=O)c1cc(ccc12)C#N</chem>                    | 1.85                 | 1.73                 | 24.33                | 536.9               | -                 | +                   | nonRB               | 0.63                | 7                   | 23                   | 34                    |
| TP3  | <chem>C[NH+](C)CC(O)C[C@]2(OC(O)c1cc(ccc12)C#N)c3ccc(F)cc3</chem>  | 0.46                 | 1.63                 | 17.51                | 447.9               | -                 | +                   | nonRB               | 0.98                | 26                  | 227                  | 26                    |
| TP4  | <chem>C[NH+](C)CCCC2(O)OCc1cc(ccc12)C#N</chem>                     | 14.51                | 6.62                 | 68.73                | 466.9               | +                 | +                   | nonRB               | 0.86                | 4                   | 227                  | 20                    |
| TP5  | <chem>Oc1ccc(cc1)[C@]3(CCC[NH+](C)C)OC(=O)c2cc(ccc23)C#N</chem>    | 0.36                 | 1.88                 | 4.21                 | 580.2               | -                 | +                   | nonRB               | 1.02                | 7                   | 227                  | 26                    |
| TP6  | <chem>C[NH2+](CC(O)C[C@]2(OCc1cc(ccc12)C#N)c3ccc(F)cc3</chem>      | 0.64                 | 4.41                 | 14.18                | 1013.3              | -                 | +                   | nonRB               | 2.20                | 26                  | 157                  | 34                    |
| TP7  | <chem>C[NH+](C)CCC[C@]2(OCc1cc(ccc12)C#N)c3ccc(O)cc3</chem>        | 0.48                 | 1.60                 | 5.91                 | 646.2               | -                 | +                   | nonRB               | 1.53                | 23                  | 227                  | 26                    |
| TP8  | <chem>NC(=O)c1ccc2c(c1)CO[C@@]2(CCC[NH+](C)C)c3ccc(F)cc3</chem>    | 1.57                 | 5.03                 | 22.03                | 752.4               | -                 | +                   | nonRB               | 1.44                | 23                  | 227                  | 23                    |
| TP9  | <chem>C[NH+](C)CC(O)C[C@]2(OCc1cc(ccc12)C#N)c3ccc(F)cc3</chem>     | 0.39                 | 3.64                 | 12.49                | 717.9               | -                 | +                   | nonRB               | 1.67                | 26                  | 157                  | 23                    |
| TP10 | <chem>C[NH+](CO)CC(O)C[C@]2(OCc1cc(ccc12)C#N)c3ccc(F)cc3</chem>    | 0.37                 | 8.00                 | 76.97                | 399.1               | +                 | +                   | nonRB               | 1.00                | 26                  | 157                  | 26                    |
| TP11 | <chem>C[NH2+](CCC(O)[C@]2(OCc1cc(ccc12)C#N)c3ccc(F)cc3</chem>      | 0.39                 | 4.74                 | 14.44                | 537.7               | -                 | +                   | nonRB               | 2.20                | 26                  | 227                  | 34                    |
| TP12 | <chem>C[NH+](C)CCC(O)[C@]2(OCc1cc(ccc12)C#N)c3ccc(F)cc3</chem>     | 0.40                 | 3.93                 | 12.73                | 657.5               | -                 | +                   | nonRB               | 1.67                | 26                  | 227                  | 94                    |
| TP13 | <chem>C[NH+](C)CC(O)C[C@]2(OC(=O)c1cc(ccc12)C#N)c3ccc(F)cc3</chem> | 0.12                 | 2.28                 | 7.10                 | 678.1               | -                 | +                   | nonRB               | 1.17                | 7                   | 157                  | 23                    |
| TP14 | <chem>Fc1ccc(cc1)[C@]3(CCC[NH+](C)C)OC(=O)c2cc(ccc23)C#N</chem>    | 0.25                 | 0.47                 | 3.15                 | 545.9               | -                 | +                   | nonRB               | 1.91                | 7                   | 157                  | 23                    |
| TP15 | <chem>Fc1ccc(cc1)[C@]3(CCC[NH2+](C)OCc2cc(ccc23)C#N</chem>         | 0.33                 | 1.15                 | 4.91                 | 1011.3              | -                 | +                   | nonRB               | 3.19                | 23                  | 157                  | 34                    |
| TP16 | <chem>Fc1ccc(cc1)[C@@]3([OH+]Cc2cc(ccc23)C#N)CCCN(C)(C)=O</chem>   | 0.08                 | 0.50                 | 6.91                 | 475.9               | -                 | +                   | nonRB               | 3.25                | 23                  | 23                   | 34                    |

<sup>1</sup> Acute Toxicity Fish (Fathead minnow LC50 (96 h)), mg/L, CONSENSUS model, T.E.S.T.

<sup>2</sup> Daphnia magna LC50 (48 h), mg/L, CONSENSUS model, T.E.S.T.

<sup>3</sup> T. pyriformis IGC50 (48 h), mg/L, CONSENSUS model, T.E.S.T.

<sup>4</sup> Oral rat LD50, mg/kg, CONSENSUS model, T.E.S.T.

<sup>5</sup> Mutagenicity (Ames test) CONSENSUS model (version 1.0.4), VEGA

<sup>6</sup> Developmental Toxicity model (CAESAR) (version 2.1.8), VEGA

<sup>7</sup> Ready Biodegradability model (IRFMN) (version 1.0.10), VEGA

<sup>8</sup> BCF model (Arnot-Gobas) (version 1.0.1), log(BCF), VEGA

<sup>9</sup> Persistence (water) quantitative model (IRFMN) (version 1.0.1) days, VEGA

<sup>10</sup> Persistence (sediment) quantitative model (IRFMN) (version 1.0.1) days, VEGA

<sup>11</sup> Persistence (soil) quantitative model (IRFMN) (version 1.0.1) days, VEGA

\* nonRB = non Readily Biodegradable

**Table S3.** Results of matrix effect (ME) evaluation

| <b>Calibration plot in the range between LOQ and 2.5 ng/mL</b>  |                              |                   |                              |                   |
|-----------------------------------------------------------------|------------------------------|-------------------|------------------------------|-------------------|
|                                                                 | <i>External calibration</i>  |                   | <i>Standard Addition</i>     |                   |
|                                                                 | Concentration level          | Average peak area | Concentration level          | Average peak area |
|                                                                 | 0.01                         | 1476.39           | 0.01                         | 272.65            |
|                                                                 | 0.05                         | 5633.74           | 0.05                         | 5174.61           |
|                                                                 | 0.1                          | 11465.08          | 0.1                          | 9078.33           |
|                                                                 | 0.5                          | 52097.56          | 2.5                          | 279854.9          |
|                                                                 | 1                            | 105538.38         |                              |                   |
|                                                                 | 2.5                          | 276744.69         |                              |                   |
| Equation                                                        | $y = (108396.9 \pm 1505.5)x$ |                   | $y = (111989.5 \pm 1978.9)x$ |                   |
|                                                                 |                              |                   |                              |                   |
| <b>Calibration plot in the range between 2.5 and 1000 ng/mL</b> |                              |                   |                              |                   |
|                                                                 | <i>External calibration</i>  |                   | <i>Standard Addition</i>     |                   |
|                                                                 | Concentration level          | Average peak area | Concentration level          | Average peak area |
|                                                                 |                              |                   |                              |                   |
|                                                                 | 2.5                          | 276744.69         | 5                            | 225143.50         |
|                                                                 | 10                           | 605115.56         | 10                           | 555707.31         |
|                                                                 | 25                           | 1614979.14        | 25                           | 1369777.11        |
|                                                                 | 50                           | 3049573.26        | 50                           | 2948505.14        |
|                                                                 | 100                          | 5710348.12        | 100                          | 5766037.52        |
|                                                                 | 250                          | 15031543.08       | 250                          | 15026532.57       |
|                                                                 | 500                          | 29901912.87       | 500                          | 23468441.51       |
|                                                                 | 1000                         | 62626401.17       | 1000                         | 58622435.74       |
|                                                                 |                              |                   |                              |                   |
| Equation                                                        | $y = (60976.6 \pm 827.2)x$   |                   | $y = (55752.3 \pm 2236.5)x$  |                   |

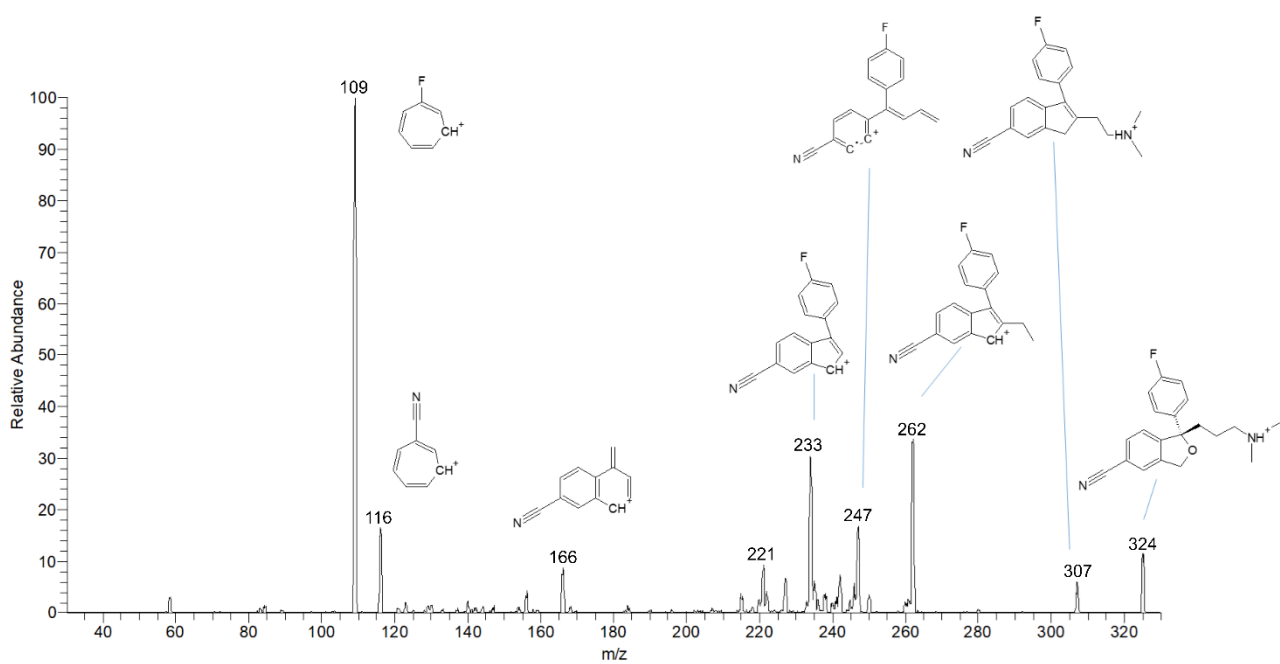

**Figure S1.** MS/MS spectrum of ESC with the chemical structures of the product ions

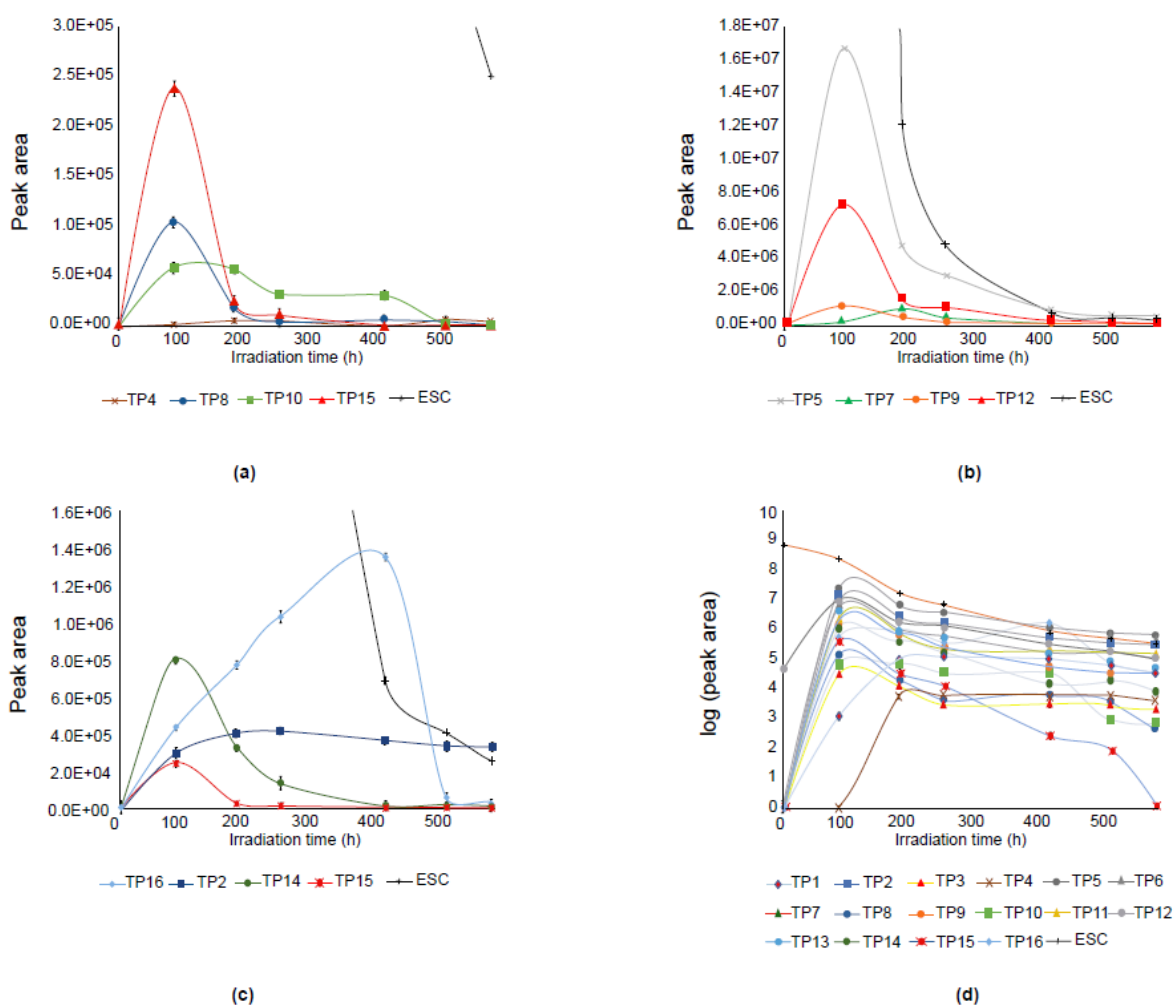

**Figure S2.** Time evolution of the peak areas of TPs formed during the ESC photodegradation

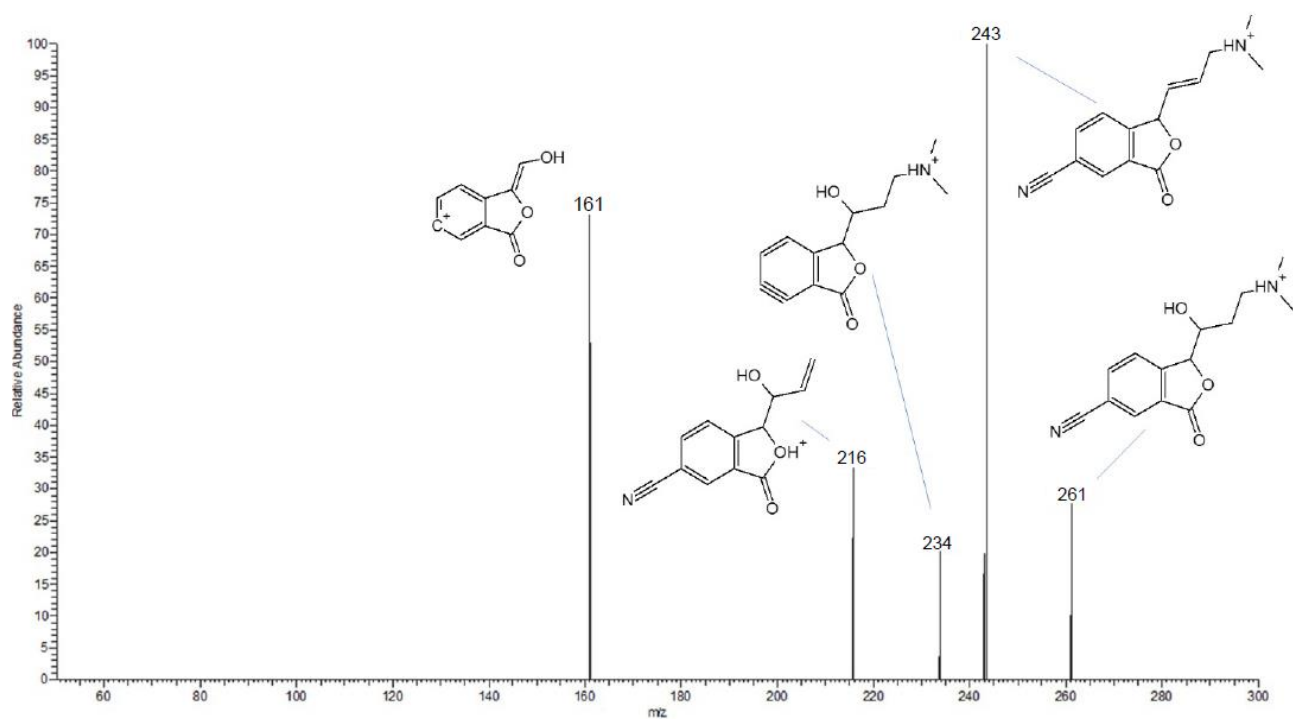

**Figure S3.** MS/MS spectrum of TP1 at  $m/z$  261 with the chemical structures of the product ions

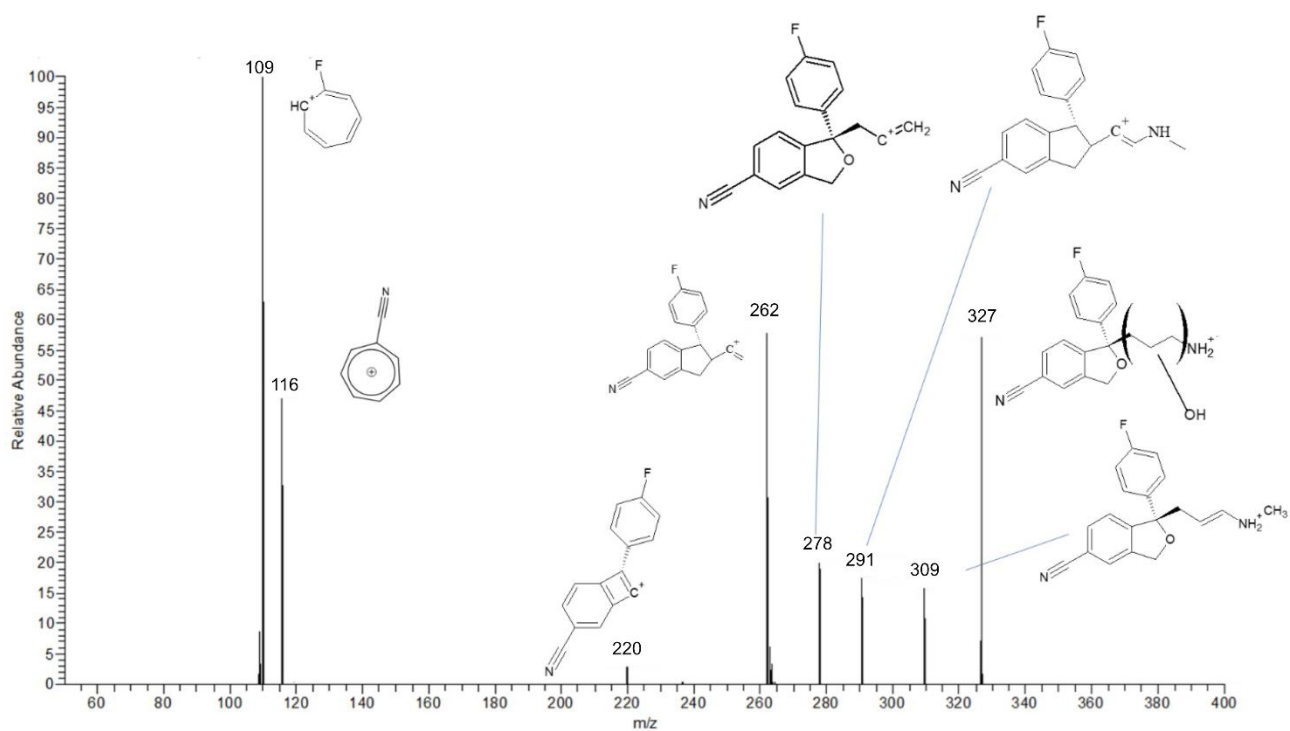

**Figure S4.** MS/MS spectrum of TP6 at  $m/z$  327 with the chemical structures of the product ions

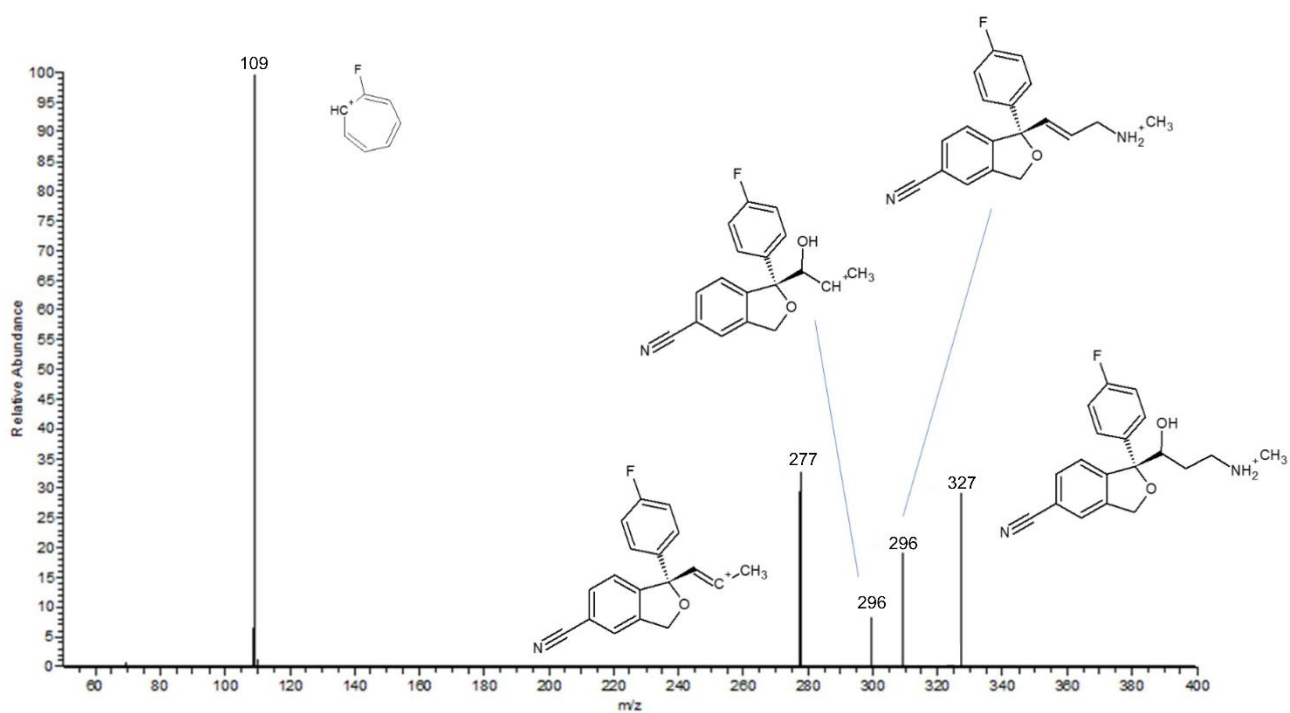

**Figure S5.** MS/MS spectrum of TP11 at  $m/z$  327 with the chemical structures of the product ions
